# Supplementary material for: HNF1A regulates colorectal cancer progression and drug resistance as a downstream of POU5F1
Source: PubMed Central journal article supplement (PMC8121855; doi:10.1038/s41598-021-89126-2), 2021-05-14
Supplement: 41598_2021_89126_MOESM1_ESM.pdf [file 41598_2021_89126_MOESM1_ESM.pdf]

***HNFL1A* regulates colorectal cancer progression and drug resistance as a downstream of *POU5F1***

Shiki Fujino, MD, PhD<sup>1,2</sup>, Norikatsu Miyoshi, MD, PhD<sup>1,2\*</sup>, Aya Ito<sup>1</sup>, Masayoshi Yasui, MD, PhD<sup>3</sup>, Chumatsuda, MD, PhD<sup>3</sup>, Masayuki Ohue, MD, PhD<sup>3</sup>, Mamoru Uemura MD, PhD<sup>1</sup>, Tsunekazu Mizushima, MD, PhD<sup>1</sup>, Yuichiro Doki, MD, PhD<sup>1</sup>, Hidetoshi Eguchi, MD, PhD<sup>1</sup>

<sup>1</sup> Department of Gastroenterological Surgery, Osaka University Graduate School of Medicine, 2-2, Yamadaoka, Suita-City, Osaka 565-0871, Japan Innovative Oncology Research and Translational Medicine, Osaka International Cancer Institute, 3-1-69, Otemae, Chuo-ku, Osaka 541-8567, Japan

<sup>2</sup> Innovative Oncology Research and Translational Medicine, Osaka International Cancer Institute, 3-1-69, Otemae, Chuo-ku, Osaka 541-8567, Japan

<sup>3</sup>Department of Surgery, Osaka International Cancer Institute, 3-1-69, Otemae, Chuo-ku, Osaka 541-8567, Japan

**\*Correspondence to:** Norikatsu Miyoshi, MD, PhD, FICS, FACS, Department of Gastroenterological Surgery, Osaka University Graduate School of Medicine, 2-2, Yamadaoka, Suita-City, Osaka, 565-0871, Japan.

E-mail: [nmiyoshi@gesurg.med.osaka-u.ac.jp](mailto:nmiyoshi@gesurg.med.osaka-u.ac.jp); Tel: +81-(0)6-6879-3251; Fax: +81-(0)6-6879-3259

Supplementary materials

**Supplementary Figure S1. FACS analysis of 603iCC (2DO)**

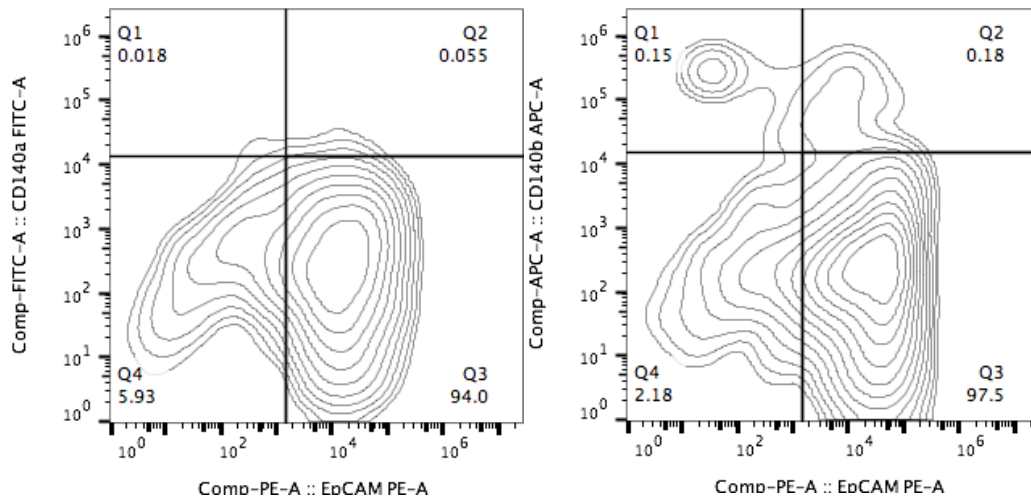

Most cells (93-99%) expressed epithelial cell adhesion molecule (EpCAM). There were few cells expressing only 140a and 140b as a stromal marker. (n=3)

**Supplementary Figure S2. Volcano plots and the hierarchical clustering analysis of extracted 538 probes**

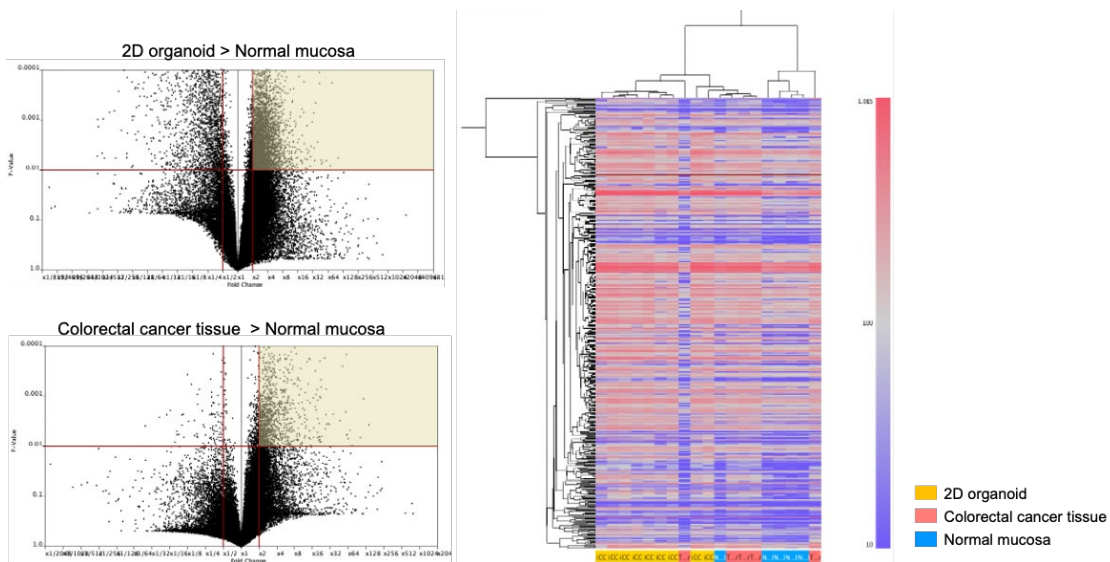

### Supplementary Figure S3. Prognosis based on TCGA database

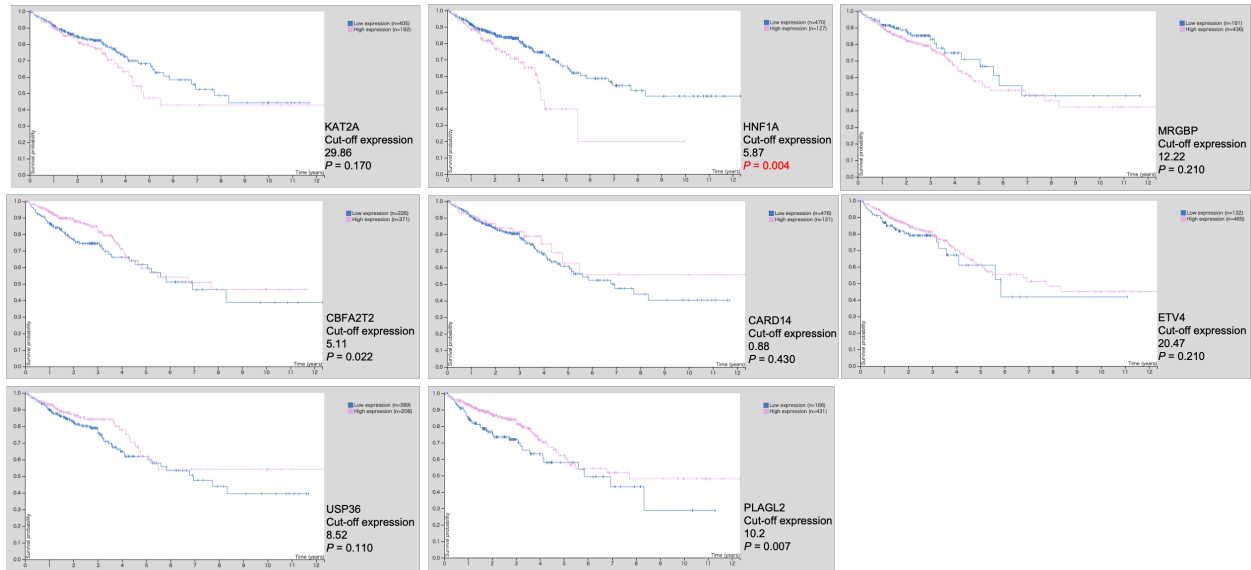

An analysis of the TCGA database showed that overall survival was lower in patients with high *HNF1A* mRNA expression levels (n = 126) compared with that in individuals with low expression levels (n = 471) ( $P = 0.008$ , log-rank test). Low expression of *CBFAIT2* (n=226) was correlated with poor prognosis compared with high expression (n=372) ( $P = 0.022$ , log-rank test). Low expression of *PLAGL2* (n=166) was correlated with poor prognosis compared with high expression (n=431) ( $P = 0.007$ , log-rank test). There was no significance in other five genes.

### Supplementary Figure S4. Western blot analysis of full-length gels and blots of Figure 1f

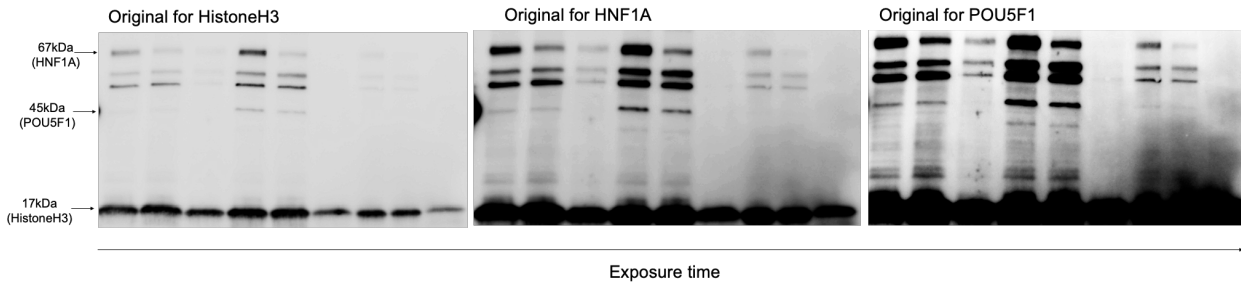

### Supplementary Figure S5. *NANOG* expression in siPOU5F1 primary cultured cells

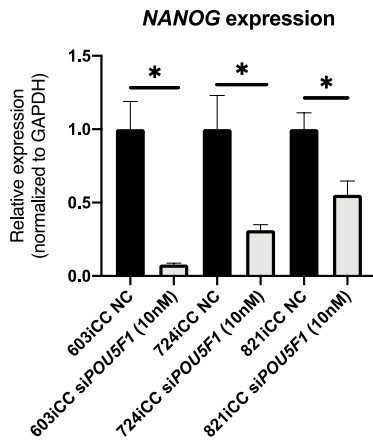

The reductions in *NANOG* expression were significant with *POU5F1* siRNA (siPOU5F1) compared to levels in the siRNA negative control (NC) groups in all three 2DOs. (n = 4) Values are presented as means  $\pm$  SEM (\*  $P < 0.05$ , Wilcoxon's rank sum test)

### Supplementary Figure S6. Immunohistochemistry of HNF1A in colon and small intestine

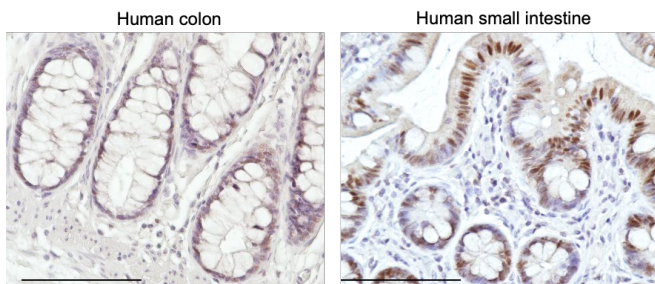

Scale bars, 100  $\mu$ m

**Supplementary Figure S7. Western blot analysis of full-length gels and blots of Figure 3a**

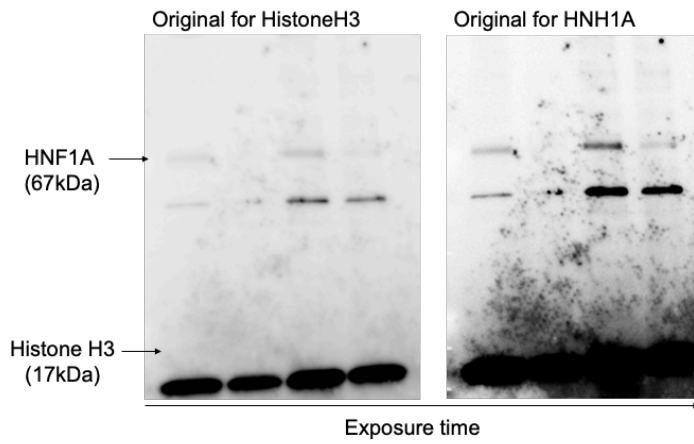

**Supplementary Figure S8. Western blot analysis of full-length gels and blots of Figure 2g**

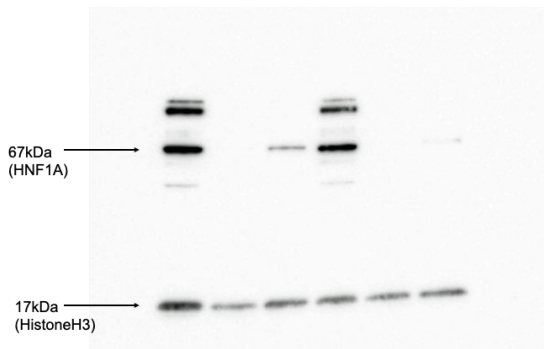

**Supplementary Figure S9. Western blot analysis of full-length gels and blots of Figure 2l**

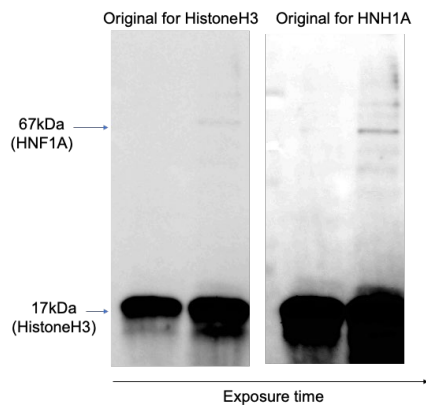

**Supplementary Figure S10. Transcription factor binding sites for HNF1A in Sorcin DNA sequences.**

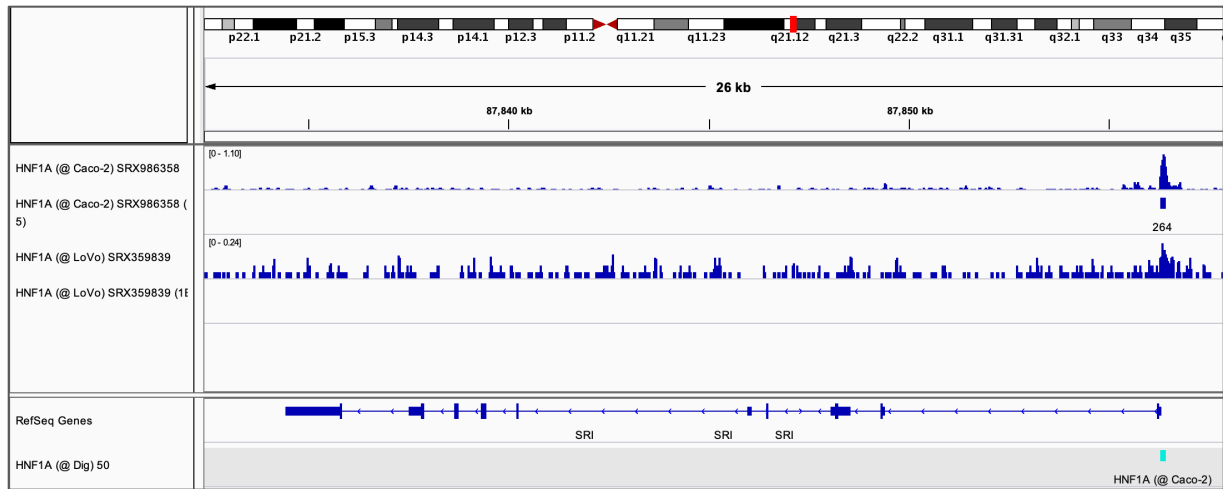

**Supplementary Figure S11. Western blot analysis of full-length gels and blots of Figure 4c**

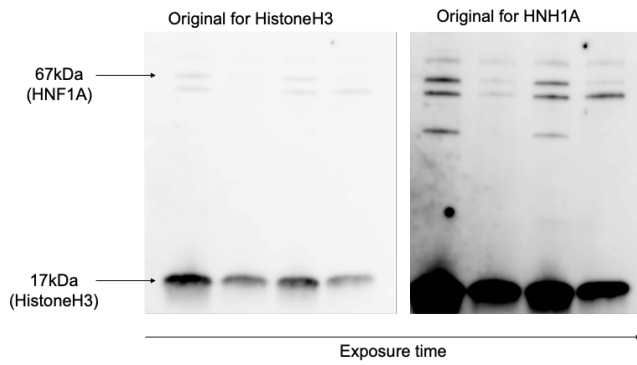

**Supplementary Figure S12. Western blot analysis of full-length gels and blots of Figure 4f**

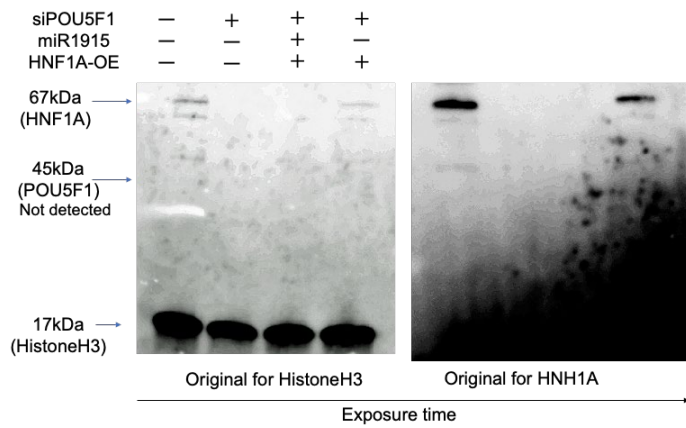

**Supplementary Table S1. Extracted genes from microarray data set**

| GENE_SYMBOL | Fold Change (CRC<br>tissue/Normal<br>mucosa) | P-Value (CRC<br>tissue/Normal<br>mucosa) | Fold Change<br>(2DO/Normal mucosa) | P-Value<br>(2DO/Normal<br>mucosa) |
|-------------|----------------------------------------------|------------------------------------------|------------------------------------|-----------------------------------|
| ACTR5       | 2.6007242                                    | 0.002702499                              | 3.2216089                          | 3.29E-05                          |
| ANKRD13B    | 5.10646                                      | 0.006340602                              | 5.037356                           | 0.005162392                       |
| ASCL2       | 18.047272                                    | 7.71E-05                                 | 12.625852                          | 3.55E-04                          |
| ATAD3B      | 2.3563848                                    | 0.001124741                              | 5.0208063                          | 1.94E-06                          |
| BCL11B      | 5.6352196                                    | 1.07E-05                                 | 3.7484183                          | 0.002325877                       |
| BRAT1       | 2.2705905                                    | 2.37E-04                                 | 2.767444                           | 3.00E-04                          |
| C15orf62    | 5.8624363                                    | 3.40E-04                                 | 17.499067                          | 1.20E-05                          |
| CARD14      | 5.6159167                                    | 0.001030086                              | 5.7345033                          | 5.06E-04                          |
| CBFA2T2     | 2.7488673                                    | 0.004288329                              | 3.4741125                          | 1.76E-04                          |
| CD3EAP      | 2.8345692                                    | 0.001983517                              | 4.5889435                          | 8.37E-04                          |
| CEP164      | 2.0949519                                    | 1.58E-04                                 | 2.2090287                          | 0.00536012                        |
| CEP250      | 2.4755936                                    | 0.009819262                              | 3.000186                           | 0.00168374                        |
| CHTF18      | 2.8745975                                    | 9.48E-04                                 | 4.918887                           | 2.06E-04                          |
| CLCN7       | 2.5373287                                    | 1.13E-04                                 | 4.8489666                          | 2.86E-06                          |
| CLUHP3      | 2.4516058                                    | 0.003222721                              | 3.1457863                          | 8.29E-05                          |
| CPNE7       | 38.327812                                    | 5.93E-05                                 | 6.817908                           | 0.004561269                       |
| DDX56       | 2.0121477                                    | 3.93E-04                                 | 3.318339                           | 1.10E-05                          |
| DGKZ        | 2.1145642                                    | 0.007079882                              | 3.5554516                          | 3.16E-05                          |
| DHX34       | 2.414038                                     | 0.004426001                              | 3.3116899                          | 3.41E-05                          |
| EIF3B       | 2.0023036                                    | 9.56E-04                                 | 3.4580317                          | 1.84E-04                          |
| ETV4        | 27.668062                                    | 2.95E-04                                 | 50.701252                          | 1.67E-09                          |
| GPC2        | 2.093818                                     | 0.006330951                              | 3.3606143                          | 0.001884945                       |
| GTF2IRD1    | 6.6503496                                    | 2.39E-05                                 | 14.820366                          | 3.87E-08                          |
| HNF1A       | 2.2075078                                    | 6.37E-04                                 | 5.028904                           | 3.85E-10                          |
| KAT2A       | 2.3386452                                    | 0.005910468                              | 2.8982682                          | 0.001219246                       |
| KCNJ14      | 2.8382833                                    | 0.001554828                              | 6.0285487                          | 1.82E-04                          |
| KLHL31      | 4.829533                                     | 0.009580796                              | 11.508928                          | 3.97E-04                          |
| LTB4R       | 2.0760553                                    | 4.13E-05                                 | 3.5700784                          | 2.96E-05                          |
| MRGBP       | 3.8491638                                    | 1.77E-04                                 | 7.6792717                          | 4.01E-07                          |
| MYBL2       | 3.365287                                     | 0.006952426                              | 5.515222                           | 0.003147385                       |
| NPEPL1      | 2.3956563                                    | 0.008784014                              | 2.895236                           | 7.98E-04                          |
| NSUN5       | 2.2134104                                    | 0.001171444                              | 3.9940946                          | 2.68E-07                          |
| OGFR        | 2.1721795                                    | 0.001294366                              | 2.1965659                          | 0.001609913                       |
| PBX4        | 3.655537                                     | 0.005184078                              | 6.178707                           | 7.14E-04                          |

|           |           |             |           |             |
|-----------|-----------|-------------|-----------|-------------|
| PCP2      | 3.273973  | 0.006895416 | 2.6210136 | 2.92E-04    |
| PLAGL2    | 2.424846  | 0.004299475 | 3.633566  | 7.82E-05    |
| RAE1      | 2.6787562 | 0.001006118 | 3.5519028 | 2.48E-05    |
| RHPN1     | 9.524554  | 0.003904573 | 8.278585  | 0.001046837 |
| RHPN1-AS1 | 11.234191 | 0.00107761  | 7.771614  | 0.00280549  |
| RNF43     | 5.297531  | 0.004413701 | 6.4659357 | 6.05E-05    |
| SLC7A6    | 2.124334  | 0.006213036 | 3.7031841 | 1.15E-05    |
| SNHG17    | 3.238493  | 0.001960859 | 4.2119837 | 2.44E-04    |
| SPACA4    | 2.8980696 | 0.005852006 | 5.463606  | 4.45E-04    |
| SPATA33   | 2.7168217 | 0.007852118 | 6.0080376 | 1.37E-05    |
| TGIF2     | 6.1790075 | 6.28E-04    | 4.6817656 | 0.001278674 |
| TONSL     | 3.922438  | 0.001746248 | 9.080728  | 6.73E-07    |
| TOP1MT    | 4.8998075 | 6.88E-04    | 3.8754423 | 4.24E-04    |
| USP36     | 2.311962  | 0.001725685 | 3.12476   | 1.60E-04    |
| VEGFA     | 4.477089  | 0.00183693  | 5.371283  | 1.81E-04    |
| YTHDF1    | 2.013948  | 0.002972835 | 2.8509667 | 2.59E-05    |
| ZNF598    | 2.6806543 | 0.002944175 | 4.287579  | 6.75E-07    |

### Supplementary Table S2. Enriched gene ontology terms

| Term                                                                 | Tumor biology | P-value  |
|----------------------------------------------------------------------|---------------|----------|
| blastocyst development                                               | Yes           | 4.50E-02 |
| placenta development                                                 |               | 9.00E-02 |
| positive regulation of protein phosphorylation                       | Yes           | 4.50E-02 |
| chromatin remodeling                                                 | Yes           | 2.20E-02 |
| regulation of transcription from RNA polymerase II promoter          | Yes           | 3.00E-02 |
| transcription from RNA polymerase II promoter                        | Yes           | 4.00E-04 |
| histone acetylation                                                  | Yes           | 8.70E-02 |
| post-embryonic camera-type eye development                           |               | 1.10E-02 |
| positive regulation of transcription from RNA polymerase II promoter | Yes           | 1.50E-02 |
| regulation of mitophagy                                              | Yes           | 8.50E-02 |
| positive regulation of protein targeting to mitochondrion            | Yes           | 2.20E-02 |



**Supplementary Table S3. Genes in enriched gene ontology terms relating tumor biology**

---

|                                                      |
|------------------------------------------------------|
| HNF1 homeobox A (HNF1A)                              |
| lysine acetyltransferase 2A (KAT2A)                  |
| PLAG1 like zinc finger 2 (PLAGL2)                    |
| vascular endothelial growth factor A (VEGFA)         |
| B-cell CLL/lymphoma 11B (BCL11B)                     |
| ETS variant 4 (ETV4)                                 |
| MRG domain binding protein (MRGBP)                   |
| MYB proto-oncogene like 2 (MYBL2)                    |
| ubiquitin specific peptidase 36 (USP36)              |
| BRCA1 associated ATM activator 1 (BRAT1)             |
| caspase recruitment domain family member 14 (CARD14) |
| POU class 5 homeobox 1 (POU5F1)                      |
| CBFA2/RUNX1 translocation partner 2 (CBFA2T2)        |
| GTF2I repeat domain containing 1 (GTF2IRD1)          |
| PBX homeobox 4 (PBX4)                                |
| topoisomerase (DNA) I, mitochondrial (TOP1MT)        |

---

**Supplementary Table S4. Patient's characteristics**

| <b>Factors</b>                              | <b>N=198</b>      |
|---------------------------------------------|-------------------|
| Gender (Male / Female)                      | 110 / 88          |
| Age*, year                                  | 66 (16-88)        |
| CEA*, ng/mL                                 | 4.2 (0.5-2171.0)  |
| Histological grade (tub1/ tub2 / muc / por) | 41 / 147 / 4 / 6  |
| Tumor invasion (T2 / T3 / T4)               | 17 / 94 / 87      |
| Lymph node metastasis (N0 / N1 / N2)        | 78 / 64 / 56      |
| Lymphatic invasion (Absent / Present)       | 83 / 115          |
| Vascular invasion (Absent / Present)        | 44 / 154          |
| Stage (I / II / III / IV)                   | 10 / 66 / 82 / 40 |
| Surgical resection (R0 / R1-2)              | 173 / 25          |

---

\*Continuous variable

Underlined values indicate  $P < 0.05$ .

tub1: well-differentiated adenocarcinoma, tub2: moderately differentiated adenocarcinoma, muc: mucinous adenocarcinoma, por: poorly differentiated adenocarcinoma.

**Supplementary Table S5. IC 50 of anti-cancer drugs**

|                                    | HT29 NC | HT29 siHNF1A | SW480 NC | SW480 siHNF1A |
|------------------------------------|---------|--------------|----------|---------------|
| 5FU ( $\mu\text{g/mL}$ )           | 3.5     | 1.4          | 27.2     | 4.0           |
| SN-38 (CPT11) ( $\mu\text{g/mL}$ ) | 12.3    | 8.4          | 33.6     | 19.1          |
| Oxaliplatin ( $\mu\text{g/mL}$ )   | 39.5    | 30.4         | 6.4      | 4.8           |

**Supplementary Table S6. Target genes of *HNF1A* predicted by Chip-Atlas**

| Target genes | HNF1A Average | SRX986358_Caco-2 |
|--------------|---------------|------------------|
| MTRNR2L2     | 321.8         | 609              |
| RGPD2        | 279.8         | 607              |
| MTRNR2L8     | 306.2         | 568              |
| SPINK1       | 310.8         | 429              |
| DDC          | 248.2         | 421              |
| MTRNR2L9     | 133.6         | 308              |
| SGK2         | 324.8         | 269              |
| <u>SRI</u>   | 342.2         | 264              |
| SRC          | 100.2         | 225              |
| GPR39        | 429           | 215              |

**Supplementary Table S7. miRNAs targeting HNF1A predicted by databases**

| miRNA name       | Total score | Ranking |
|------------------|-------------|---------|
| hsa-miR-1915-3p  | 6           | 1       |
| hsa-miR-6764-5p  | 7           | 2       |
| hsa-miR-548at-5p | 10          | 3       |
| hsa-miR-484      | 17          | 4       |
| hsa-miR-6748-3p  | 21          | 5       |
| hsa-miR-3155b    | 22          | 6       |
| hsa-miR-3155a    | 23          | 7       |
| hsa-miR-4690-5p  | 27          | 8       |
| hsa-miR-4438     | 32          | 9       |
| hsa-miR-1343-3p  | 35          | 10      |
| hsa-miR-1205     | 35          | 11      |
| hsa-miR-604      | 35          | 12      |
| hsa-miR-6721-5p  | 35          | 13      |
| hsa-miR-6783-3p  | 36          | 14      |
| hsa-miR-6787-3p  | 39          | 15      |
| hsa-miR-6815-3p  | 42          | 16      |
| hsa-miR-4650-5p  | 42          | 17      |
| hsa-miR-6852-5p  | 52          | 18      |
| hsa-miR-4755-3p  | 54          | 19      |

**Table S8. Primer lists**

| Primer    | Sequence 5'-3'          | UPL No. |
|-----------|-------------------------|---------|
| HNF1A-L   | GAGGCAGAAGAACCCTAGCA    | 25      |
| HNF1A-R   | GACACCCCTCTCTGGATGC     |         |
| GAPDH-L   | AGCCACATCGCTCAGACAC     | 60      |
| GAPDH-R   | GCCCAATACGACCAAATCC     |         |
| POU5F1-L  | GCTTCAAGAACATGTGTAAGCTG | 69      |
| POU5F1-R  | CACGAGGGTTTCTGCTTTG     |         |
| GLUT1_L   | CCAGCAGCAAGAAGCTGAC     | 52      |
| GLUT1_R   | TGATGACTCCAGTGTTGTAGCC  |         |
| GLUT3_L   | CCGCTGCTACTGGGTTTTAC    | 4       |
| GLUT3_R   | CTTTCAGGGCAAAATGGAAG    |         |
| SRIv1v3_L | AGTCTGCAGCATGGCGTA      | 70      |
| SRIv1v3_R | GCGGATCCTGAGTTTGTCC     |         |
| SRIv2v4_L | CGGCTTATGGTTTCAATGCT    | 26      |
| SRIv2v4_R | TGTTGTCTCCAGCCATTCAG    |         |

Commercially available primers:

HIF1A (PrimePCR SYBR Assay, Desalt 200R Wet-Validated, Predesign. 10025636) (Bio-Rad, Hercules, CA, USA)
